# Supplementary material for: TWIST1 and TWIST2 promoter methylation and protein expression in tumor stroma influence the epithelial-mesenchymal transition-like tumor budding phenotype in colorectal cancer
Source: PubMed Central journal article supplement (PMC4359262; doi:10.18632/oncotarget.2716), 2014-11-26
Supplement: oncotarget-06-874-s001.pdf [file oncotarget-06-874-s001.pdf]

SUPPLEMENTARY FIGURES AND TABLES

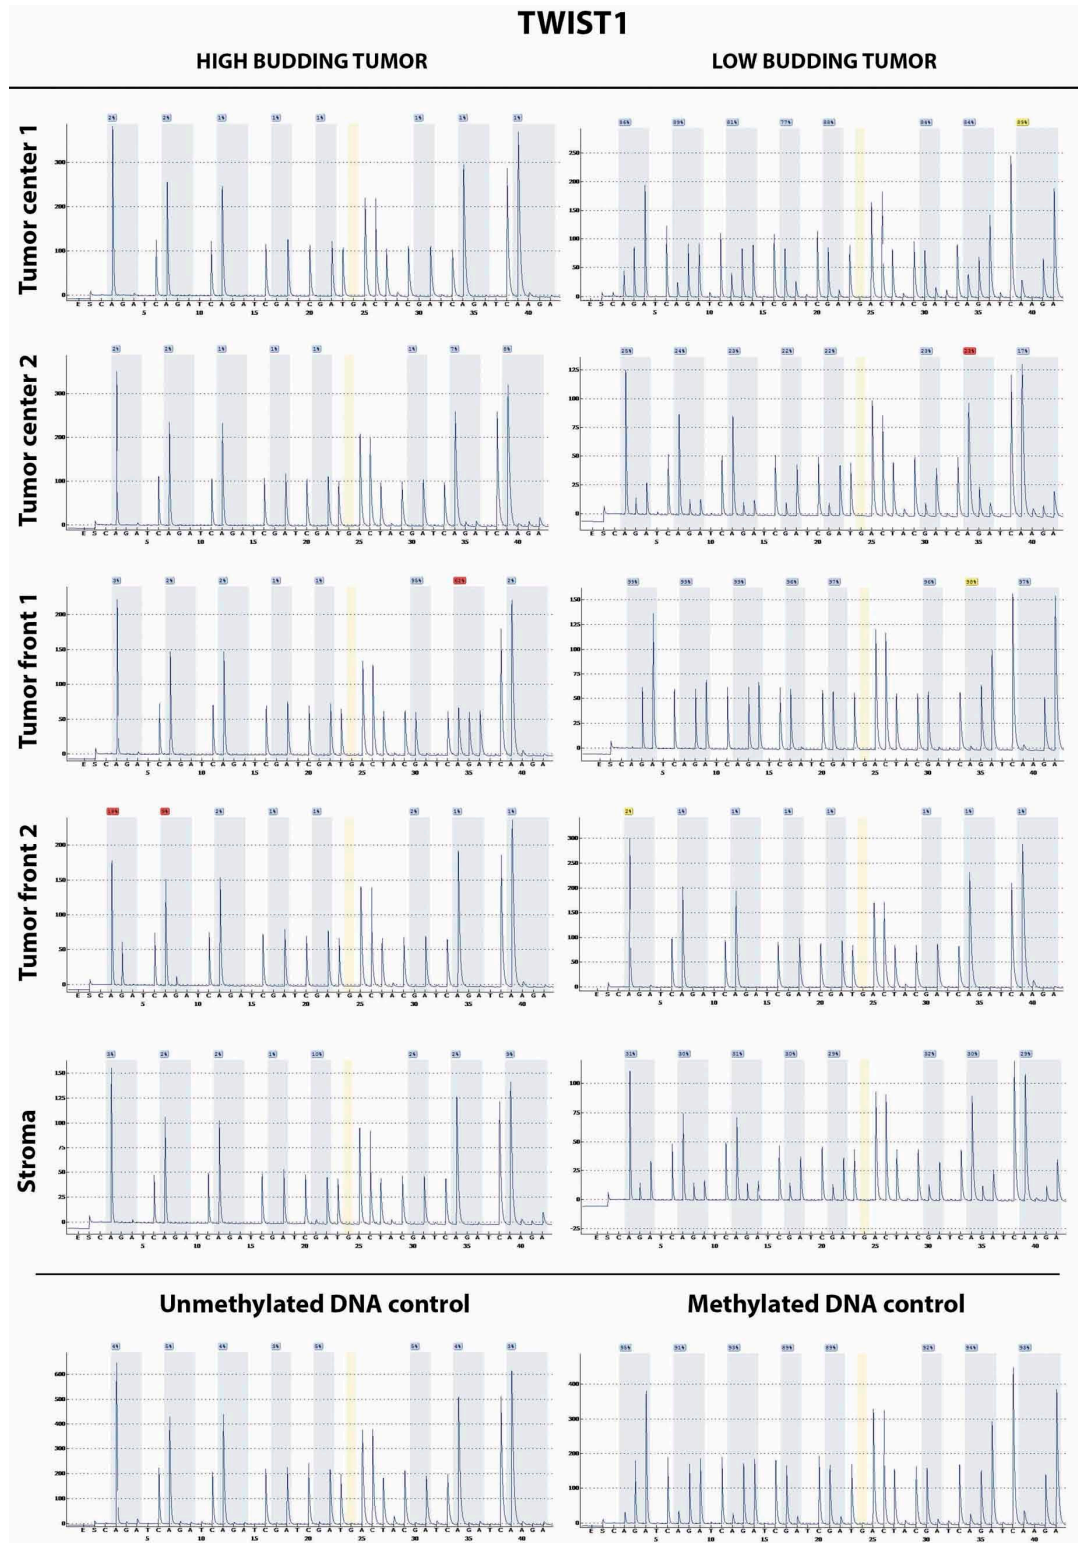

Supplementary Figure S1: Pyrograms showing successful TWIST1 methylation analysis of laser captured tumor center, tumor invasion front and tumor stroma in a low-grade and high-grade budding cancer

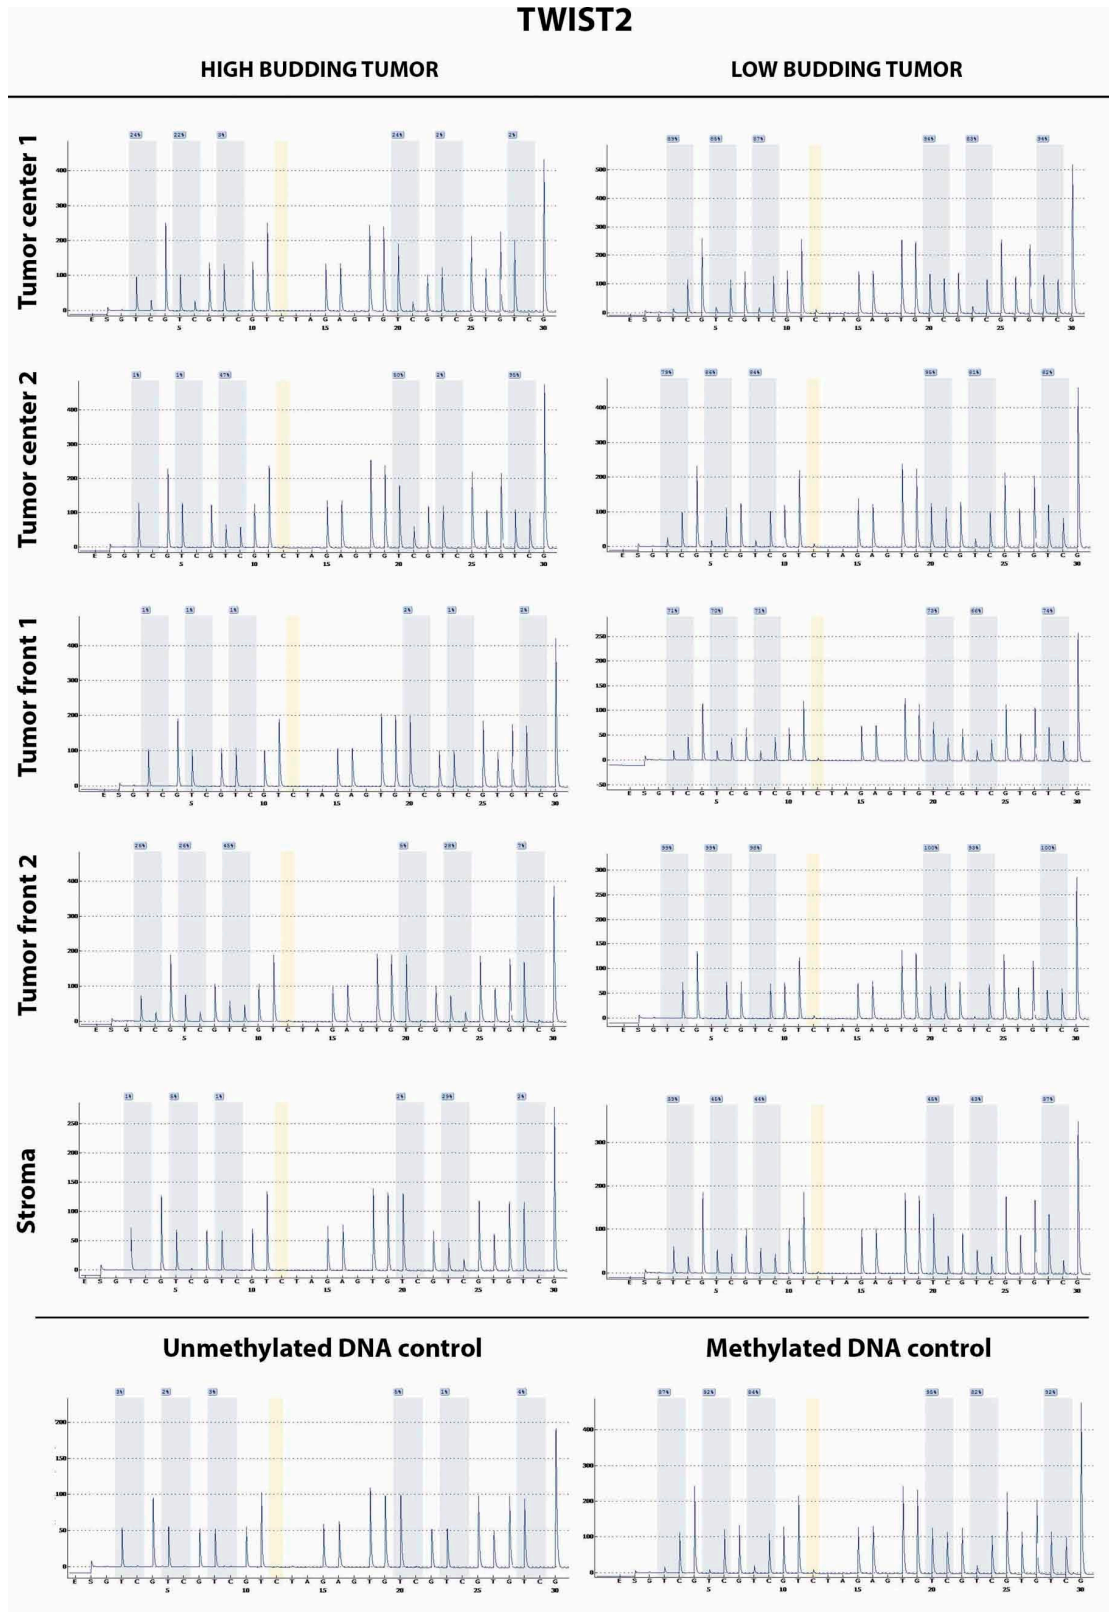

Supplementary Figure S2: Pyrograms showing successful TWIST2 methylation analysis of laser captured tumor center, tumor invasion front and tumor stroma in a low-grade and high-grade budding cancer



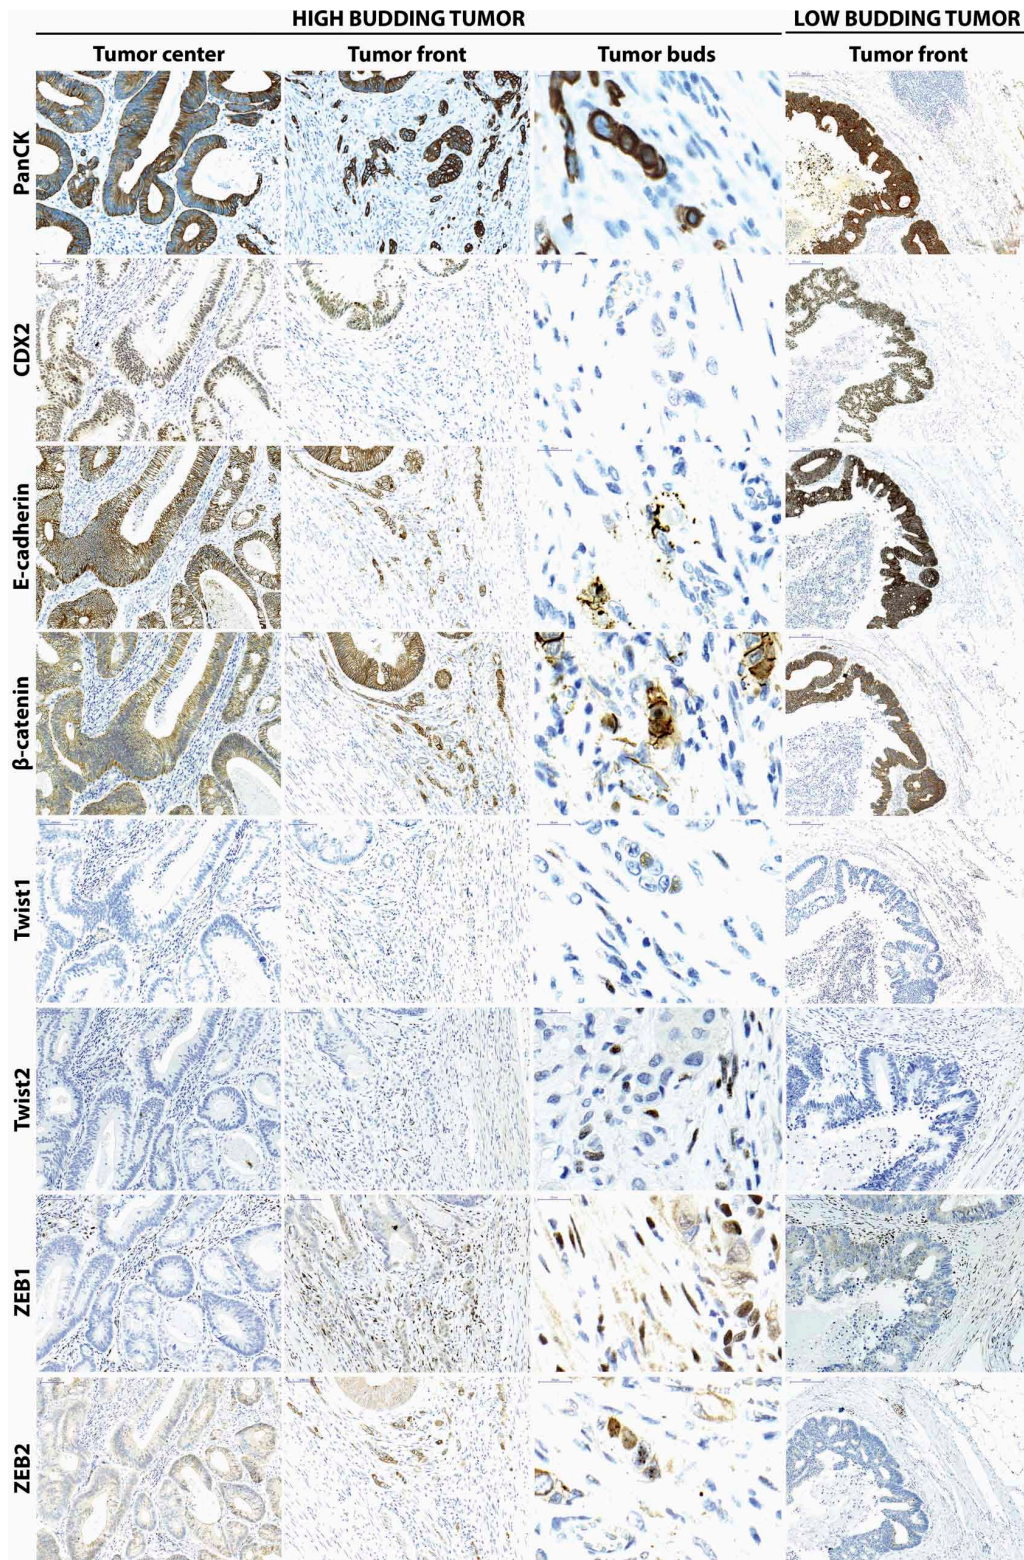

Supplementary Figure S3: Immunohistochemistry panel showing a high-grade budding cancer with focus on tumor center, invasion front (200x magnification, scale bar = 100  $\mu$ m) and tumor buds (1000x magnification, scale bar = 20  $\mu$ m), and a low-grade cancer (100x magnification, scale bar 200  $\mu$ m). Staining includes  $\beta$ -catenin, E-cadherin, CDX2, TWIST1, TWIST2, ZEB1 and ZEB2.

**Supplementary Table S1: Association of TWIST1 and TWIST2 hypermethylation and clinicopathological features**

| Feature              |              | Methylation TWIST1<br>(n = 109) |               | P-value | Methylation TWIST2<br>(n = 185) |                | P-value |
|----------------------|--------------|---------------------------------|---------------|---------|---------------------------------|----------------|---------|
|                      |              |                                 |               |         |                                 |                |         |
|                      |              | Low (n = 92)                    | High (n = 17) |         | Low (n = 80)                    | High (n = 105) |         |
| Gender               | Male         | 42 (45.7)                       | 8 (47.1)      | 0.9148  | 40 (50.0)                       | 49 (46.7)      | 0.653   |
|                      | Female       | 50 (54.4)                       | 9 (52.9)      |         | 40 (50.0)                       | 56 (53.3)      |         |
| Histological subtype | Non-mucinous | 81 (87.1)                       | 16 (94.1)     | 0.4096  | 70 (86.4)                       | 92 (87.6)      | 0.8088  |
|                      | Mucinous     | 12 (12.9)                       | 1 (5.9)       |         | 11 (13.6)                       | 13 (12.4)      |         |
| Tumor grade          | G1-2         | 58 (62.4)                       | 12 (70.6)     | 0.517   | 48 (59.3)                       | 70 (66.7)      | 0.2983  |
|                      | G3           | 35 (37.6)                       | 5 (29.4)      |         | 33 (40.7)                       | 35 (33.3)      |         |
| pT                   | pT1-2        | 26 (28.0)                       | 6 (35.3)      | 0.5402  | 16 (19.8)                       | 31 (29.5)      | 0.1284  |
|                      | pT3-4        | 67 (72.0)                       | 11 (64.7)     |         | 65 (80.3)                       | 74 (70.5)      |         |
| pN                   | pN0          | 47 (50.5)                       | 6 (35.3)      | 0.2474  | 39 (48.2)                       | 55 (52.4)      | 0.567   |
|                      | pN1-2        | 46 (49.5)                       | 11 (64.7)     |         | 42 (51.9)                       | 50 (47.6)      |         |
| pM                   | pM0          | 80 (87.0)                       | 15 (88.2)     | 0.8849  | 70 (86.4)                       | 94 (90.4)      | 0.399   |
|                      | pM1          | 12 (13.0)                       | 2 (11.8)      |         | 11 (13.6)                       | 10 (9.6)       |         |
| V                    | V0           | 73 (76.0)                       | 15 (88.2)     | 0.2642  | 66 (80.5)                       | 89 (83.2)      | 0.6333  |
|                      | V1-2         | 23 (24.0)                       | 2 (11.8)      |         | 16 (19.5)                       | 18 (16.8)      |         |
| L                    | L0           | 52 (55.9)                       | 9 (52.9)      | 0.8206  | 50 (61.7)                       | 62 (59.1)      | 0.7111  |
|                      | L1-2         | 41 (44.1)                       | 8 (47.1)      |         | 31 (38.3)                       | 43 (41.0)      |         |
| Budding              | Low-grade    | 83 (88.3)                       | 17 (100.0)    | 0.1373  | 39 (48.2)                       | 65 (61.3)      | 0.0724  |
|                      | High-grade   | 11 (11.7)                       | 0 (0.0)       |         | 42 (51.9)                       | 41 (38.7)      |         |

**Supplementary Table S2: Patient and tissue microarray characteristics**

| TMA characteristics          |                 | Cohort 1      |  | Cohort 2            |  |
|------------------------------|-----------------|---------------|--|---------------------|--|
| Origin:                      |                 | Greece        |  | Switzerland         |  |
| Total no. patients           |                 | N = 215       |  | N = 139             |  |
| TMA Punch size               |                 | 0.6mm         |  | 1.0mm               |  |
| No. punches                  |                 | 4/tumor       |  | 1/tumor             |  |
| Patients included from:      |                 | 2002–2006     |  | 2002–2011           |  |
| Surgical specimen/Biopsy     |                 | Surgery       |  | Preoperative biopsy |  |
| Clinicopathological features |                 |               |  |                     |  |
| Age (yrs)                    | Mean (min, max) | 68.4 (35, 93) |  | 70.2 (30–93)        |  |
| Tumour size (cm)             | Mean (min, max) | 4.6 (1, 12)   |  | -                   |  |
| Gender                       | Male            | 99 (48.3)     |  | 87 (63.0)           |  |

(Continued)

| TMA characteristics    |                 | Cohort 1   | Cohort 2    |
|------------------------|-----------------|------------|-------------|
|                        | Female          | 106 (51.7) | 51 (37.0)   |
| Histological subtype   | Non-mucinous    | 181 (88.3) | 116 (86.6)  |
|                        | Mucinous        | 24 (11.7)  | 18 (13.4)   |
| Tumour grade           | G1-2            | 130 (63.4) | 81 (68.1)   |
|                        | G3              | 75 (36.6)  | 38 (31.9)   |
| Tumour location        | Left            | 124 (60.5) | 43 (31.4)   |
|                        | Rectum          | 27 (13.2)  | 39 (28.5)   |
|                        | Right           | 54 (26.3)  | 55 (40.2)   |
| pT                     | pT1+pT2         | 51 (24.9)  | 37 (26.8)   |
|                        | pT3+pT4         | 154 (75.1) | 101 (73.2)  |
| pN0                    | pN0             | 103 (50.2) | 69 (50.0)   |
|                        | pN1-2           | 102 (49.8) | 69 (50.0)   |
| pM                     | pM0             | 183 (89.3) | 98 (73.1)   |
|                        | pM1             | 22 (10.7)  | 36 (26.9)   |
| TNM stage              | Stage I         | 41 (21.8)  | 24 (17.9)   |
|                        | Stage II        | 53 (28.2)  | 34 (25.4)   |
|                        | Stage III       | 76 (40.4)  | 40 (29.9)   |
|                        | Stage IV        | 22 (9.6)   | 36 (26.9)   |
|                        | TNM staging ed. | 6th        | 7th         |
| Tumour budding         | Low-grade       | 115 (55.3) | 71 (59.7)*  |
|                        | High-grade      | 93 (45.7)  | 48 (40.3)   |
| Venous invasion        | Present         | 38 (18.1)  | 64 (53.3)   |
|                        | Absent          | 172 (81.9) | 56 (46.7)   |
| Lymphatic invasion     | Present         | 84 (40.6)  | 35 (29.9)   |
|                        | Absent          | 123 (59.4) | 82 (70.1)   |
| Post-operative therapy | Untreated       | 76 (36.2)  | 108 (77.7)  |
|                        | Treated         | 134 (63.8) | 31 (22.3)   |
| Pre-operative therapy  | Untreated       | 210 (100%) | 117 (86.0)  |
|                        | Treated         | 0 (0%)     | 19 (14.0)   |
| MMR status             | Proficient      | 176 (91.7) | 91 (85.1%)  |
|                        | Deficient       | 16 (8.3)   | 16 (15%)    |
| Survival time (months) | Median (95%CI)  | 60 (48-65) | 101 (62-NE) |

NE: Not evaluable

\*In cohort 2, this value represents intratumoral budding (ITB), and not peritumoral budding
